# Supplementary figures and images for: Nickel molecular catalyst grafted graphene quantum dots on porous NiO as a photocathode for H2evolution under visible light
Source: Royal Society of Chemistry journal article supplement (doi:10.1039/d2nj05170b), 2022-12-14

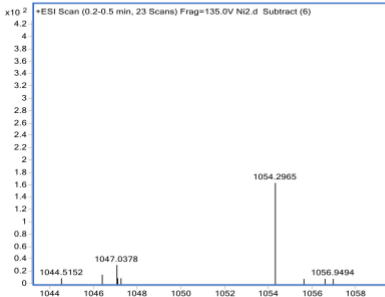

Supplement: d2nj05170b10.pdf [file d2nj05170b10.pdf]

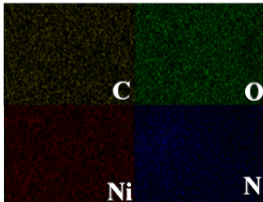

Supplement: d2nj05170b11.pdf [file d2nj05170b11.pdf]

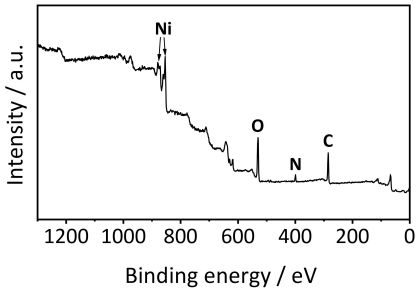

Supplement: d2nj05170b12.pdf [file d2nj05170b12.pdf]

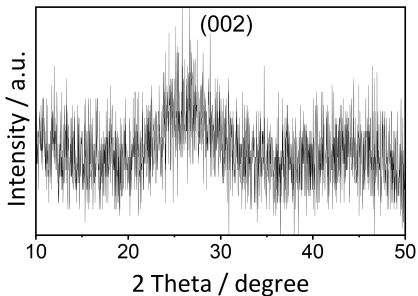

Supplement: d2nj05170b2.pdf [file d2nj05170b2.pdf]

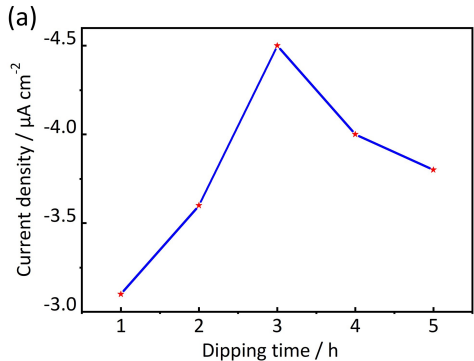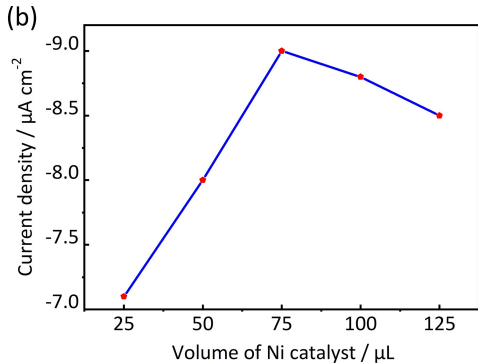

Supplement: d2nj05170b3.pdf [file d2nj05170b3.pdf]

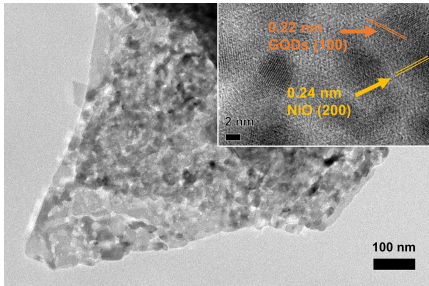

Supplement: d2nj05170b4.pdf [file d2nj05170b4.pdf]

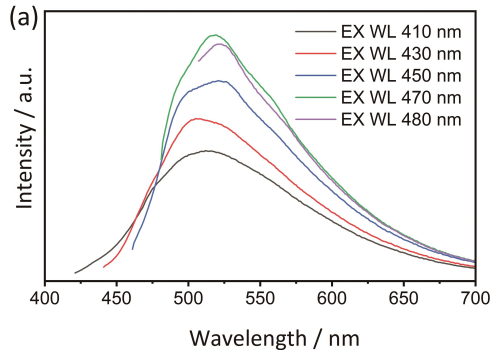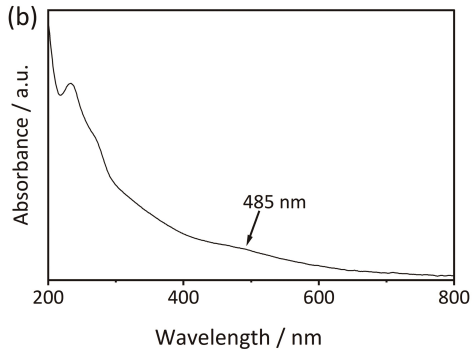

Supplement: d2nj05170b5.pdf [file d2nj05170b5.pdf]

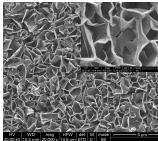

Supplement: d2nj05170b6.pdf [file d2nj05170b6.pdf]

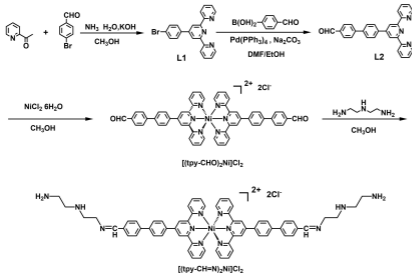

Supplement: d2nj05170b7.pdf [file d2nj05170b7.pdf]

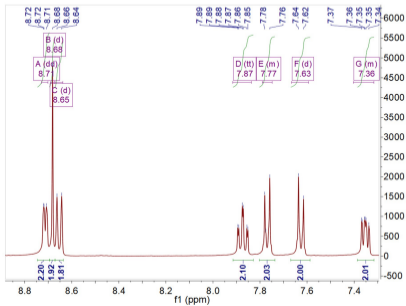

Supplement: d2nj05170b8.pdf [file d2nj05170b8.pdf]

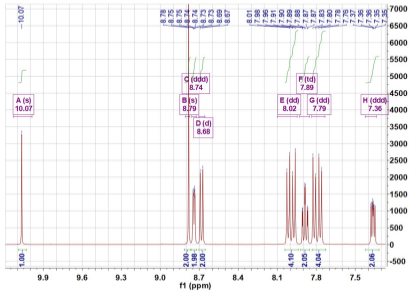

Supplement: d2nj05170b9.pdf [file d2nj05170b9.pdf]
